# Supplementary material for: Synthesis, metal binding and spectral properties of novel bis-1,3-diketone calix[4]arenes
Source: Royal Society of Chemistry journal article supplement (doi:10.1039/c6nj03381d), 2017-01-01
Supplement: c6nj03381d1.pdf [file c6nj03381d1.pdf]

## Synthesis, metal binding and spectral properties of novel bis-1,3-diketone calix[4]arenes

Sergey N. Podyachev<sup>a,\*</sup>, Svetlana N. Sudakova<sup>a</sup>, Gulnaz Sh. Gimazetdinova<sup>b</sup>,  
Nataliya A. Shamsutdinova<sup>a</sup>, Victor V. Syakaev<sup>a</sup>, Tatjana A. Barsukova<sup>a</sup>,  
Nobuhiko Iki<sup>c</sup>, Dmitry V. Lapaev<sup>d</sup>, Asiya R. Mustafina<sup>a</sup>

<sup>a</sup> *A. E. Arbuzov Institute of Organic and Physical Chemistry, Kazan Scientific Center of Russian Academy of Sciences, Arbuzov str., 8, 420088, Kazan, Russia.*

<sup>b</sup> *Kazan National Research Technological University, K. Marks str., 68, 420015, Kazan, Russia.*

<sup>c</sup> *Graduate School of Environmental Studies, Tohoku University, 6-6-07 Aramaki-Aoba, Aoba-ku, Sendai 980-8579, Japan.*

<sup>d</sup> *Zavoisky Physical-Technical Institute of Kazan Scientific Center of Russian Academy of Sciences, 420029 Kazan, Russia.*

## Electronic Supplementary Information

### Content

|                                                  |    |
|--------------------------------------------------|----|
| 1. UV-Vis absorption spectra of Ln-L             | S2 |
| 2. Excitation spectra of Tb-L and Eu-L complexes | S2 |
| 3. Luminescence decay curves of Tb-L complexes   | S3 |
| 4. Luminescence spectra of Gd-L complexes        | S4 |

---

\* Corresponding author. Fax: +7-843-273-1872; e-mail: [spodyachev@iopc.ru](mailto:spodyachev@iopc.ru)

† Electronic supplementary information (ESI) available. For ESI  
see DOI: XXXXXXXXXXXXXXX

## 1. UV-Vis absorption spectra of Ln-L

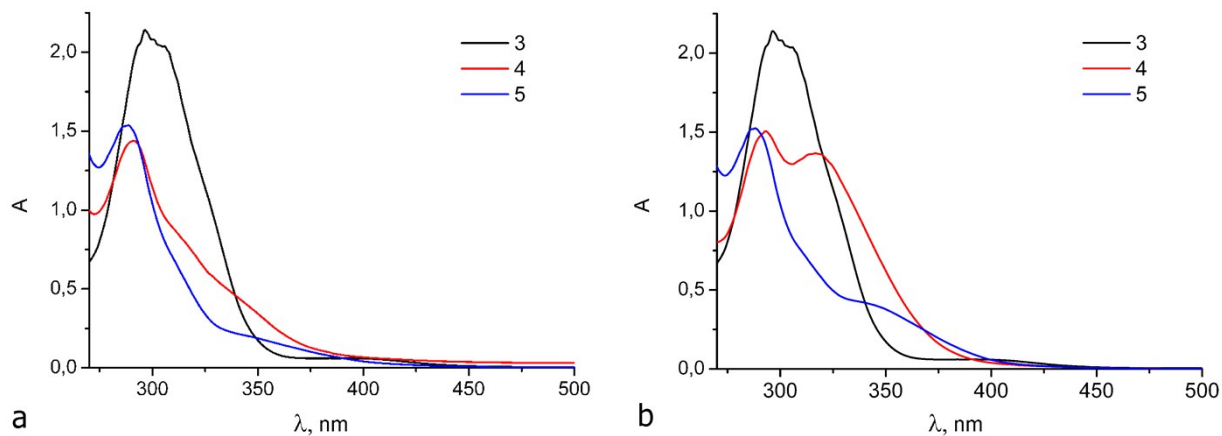

**Figure S1.** UV-Vis absorption spectra of ligands **3**, **4** and **5** ( $C_L=0.1$  mM) in DMF in alkalinized DMF ( $C_{TEA}=0.8$  mM) after 1 (a) and 4 (b) day storage of solution.

## 2. Excitation spectra of Tb-L and Eu-L complexes

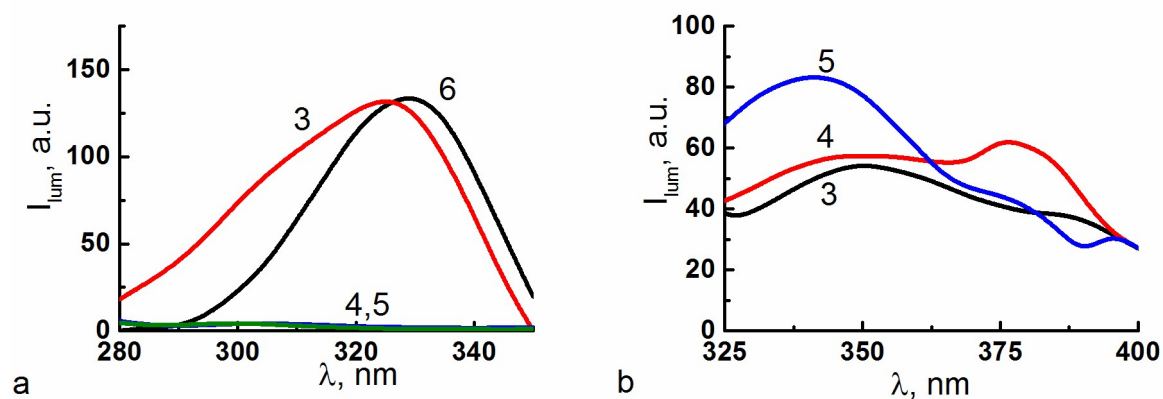

**Figure S2.** Excitation spectra of alkalinized DMF solutions of ligands **3-6** with  $Tb^{3+}$  (a) and  $Eu^{3+}$  (b).  $C_L = C_{Ln^{3+}} = 0.1$  mM,  $C_{TEA} = 0.4$  mM.  $\lambda_{em} = 545$  nm (a) and 612 nm (b).

### 3. Luminescence decay curves of Tb-L complexes

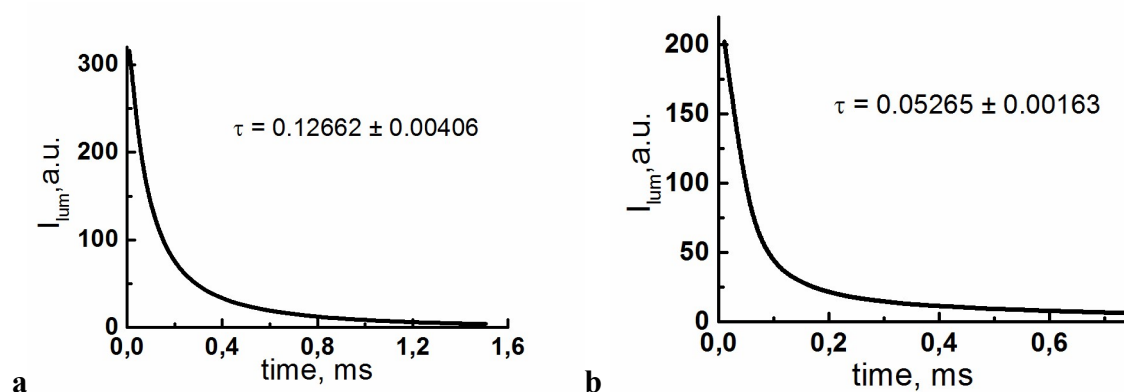

**Figure S3.** Luminescence decay curves of alkalized DMF solutions of  $Tb^{3+}$  with **3** (a) ( $\lambda_{ex} = 320$  nm,  $\lambda_{em} = 545$  nm.  $R^2=0.992$ ) and **6** (b) ( $\lambda_{ex} = 325$  nm,  $\lambda_{em} = 545$  nm.  $R^2=0.989$ ).  $C_L = C_{Tb(III)} = 0.1$  mM,  $C_{TEA} = 0.4$  mM.

### 4. Luminescence spectra of Gd-L complexes

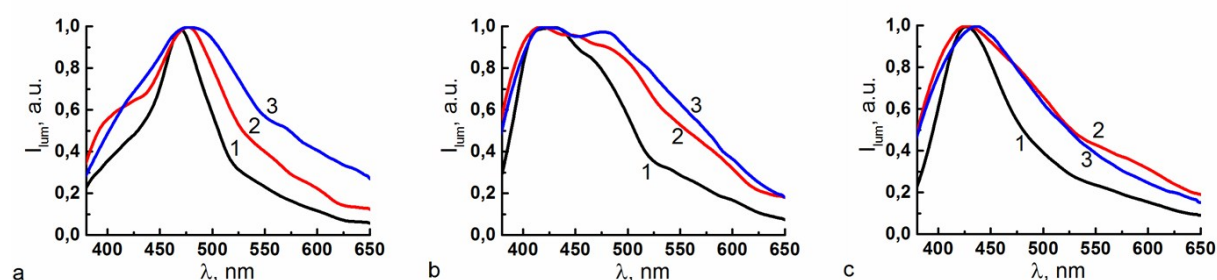

**Figure S4.** Luminescence spectra of alkalized DMF solutions of ligands **3** (a), **4** (b), **5** (c) with  $Gd^{3+}$  at different delay times: 1 (1), 10 (2) and 20 (3)  $\mu s$ .  $C_L = C_{Ln^{3+}} = 0.1$  mM,  $C_{TEA} = 0.4$  mM.
